# Supplementary material for: Histone H3.3 phosphorylation promotes heterochromatin formation by inhibiting H3K9/K36 histone demethylase
Source: PubMed Central journal article supplement — Nucleic Acids Res. 2022 Apr 22;50(8):4500–14. doi: 10.1093/nar/gkac259 (PMC9071403; doi:10.1093/nar/gkac259), 2022-04-22
Supplement: gkac259_supplemental_file.pdf [file gkac259_supplemental_file.pdf]

**Suppl Figure 1. Targeting of *h3f3a* and *h3f3b*.** (A) The targeting vector comprised of a neomycin selection cassette and a reporter coding sequence (cds) (yellow fluorescent protein (*yfp*) and cyan fluorescent protein (*cfp*) coding sequences for *H3f3a* and *H3f3b* targeting vectors, respectively). The targeting sequence substituted for much of exon 2 for *h3f3a* (encoding the first 17 amino acids) and all of exon 2 for *h3f3b* (encoding the first 41 amino acids). Exposure to Flp recombinase removed the *neo* selection cassette to produce the conditional alleles. The cassette arrangement and positioning of the *loxP* sites allows for conditional allelic replacement: on *Cre*-mediated excision of the H3.3 cds, an alternative cds is brought under control of the endogenous promoter, this being the *yfp* cds for *h3f3a*, and the *cfp* cds for *h3f3b*. The yellow shading marks the regions where strand exchange would be expected to occur. The red line marks a potential and undesired internal strand exchange (ISE) event occurring due to internal regions of homology. Such events would lead to loss of upstream targeting vector sequence including the *loxP* site. *SpA*, synthetic splice acceptor; *ex*, exon; *neo*, neomycin positive selection cassette; *dtA*, diphtheria toxin A chain negative selection cassette; E, *EcoRI*, K, *KpnI*; N, *NheI*; X, *XhoI* sites; *pBS*, pBluescript vector. (B) Generation of H3.3 S31, A31 and E31 mouse ES cell lines by exogenous expression of H3.3 S31, A31 and E31 in *h3f3a<sup>fl</sup>h3f3b<sup>fl</sup>* line carrying conditional *h3f3a* and *h3f3b* alleles, followed by *Cre*-recombinase to excise H3.3 cds. (C) Southern blot analyses were performed using probes specific to either *h3f3a* (top) or *h3f3b* (bottom) genomic locus. In addition to wildtype (WT), *h3f3a<sup>fl</sup>h3f3b<sup>fl</sup>*, H3.3 S31, A31 and E31 mouse ES cell lines, *h3f3a<sup>-/-</sup>h3f3b<sup>+/+</sup>* and *h3f3<sup>+/+</sup>h3f3b<sup>-/-</sup>* cell lines were included as controls. For probing of *h3f3a* targeting, the genomic DNA was digested with *KpnI* enzyme, followed by Southern blot transfer and hybridisation. The WT cells gave a single 2.9 kb band, while *h3f3a<sup>fl</sup>h3f3b<sup>fl</sup>* cells showed a 5.2 kb band. Successful deletion of *h3f3a* cds in H3.3 S31, A31, E31 and *h3f3a<sup>-/-</sup>h3f3b<sup>+/+</sup>* mouse ES cell lines resulted in a 3.9 kb band. For probing of *h3f3b* targeting, the genomic DNA was digested with *EcoRI* enzyme, followed by Southern blot transfer and hybridisation. The WT cells gave a single 3.9 kb band, while *h3f3a<sup>fl</sup>h3f3b<sup>fl</sup>* cells showed a 7.2 kb band. Successful deletion of *h3f3b* cds in H3.3 S31, A31, E31 and *h3f3<sup>+/+</sup>h3f3b<sup>-/-</sup>* mouse ES cell lines resulted in a 4.9 kb band. (D) Western blot analyses of cell lysates extracted from wildtype, H3.3 S31, A31 and E31 H3.3 mouse ES cell lines. *Cre*-recombinase mediated excision of H3.3 cds resulted in expression of YFP/CFP fluorescent proteins in H.3 S31, A31 and E31 expressing cells. H3.3 protein levels were comparable between the different clones. Actin was used as a loading control. (E) Schematic diagram showing specific primers used in qPCR to assess expression of H3.3 S31, A31 and E31 expression. (F-L) Western blot analyses of H3.3 S31, A31 and E31 H3.3 mouse ES cell lines with antibodies against H3.3, H3K4me3, H3K9me3, H3K36me3, H3K27me3 and H3K27ac. (M) Western blot analyses of mouse ES cell lysates extracted from H3.3 knockout (*h3f3a<sup>-/-</sup>h3f3b<sup>-/-</sup>*) expressing only exogenous HA-H3.3 (lane 1, 18 KDa), WT (*h3f3a<sup>+/+</sup>h3f3b<sup>+/+</sup>*) expressing both endogenous H3.3 and exogenous HA-H3.3 (lane 2, 17 KDa and 18 KDa bands, respectively), wildtype cells expressing only endogenous H3.3 (lane 3, 17 KDa) and H3.3B knockout (*h3f3<sup>+/+</sup>h3f3b<sup>-/-</sup>*) cells expressing a lower level of endogenous H3.3 (lane 4). Compared to WT H3.3 S31 cells (lane 3), H3.3B knockout (*h3f3<sup>+/+</sup>h3f3b<sup>-/-</sup>*) cells showed a reduced H3.3 protein level given they only expressed H3.3 from the H3.3A genes (53). Actin was used as a loading control.

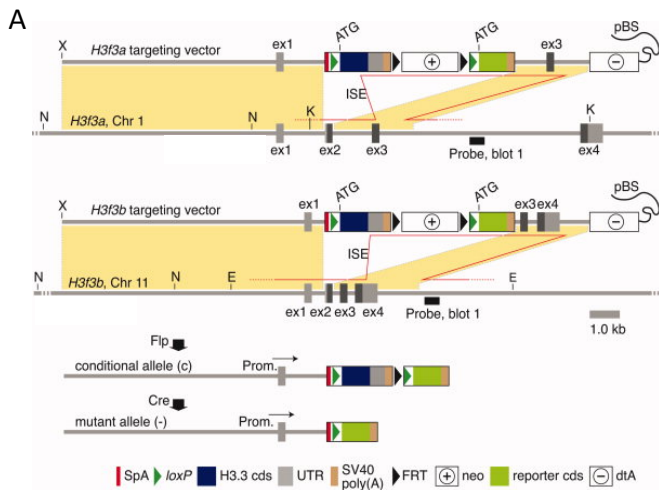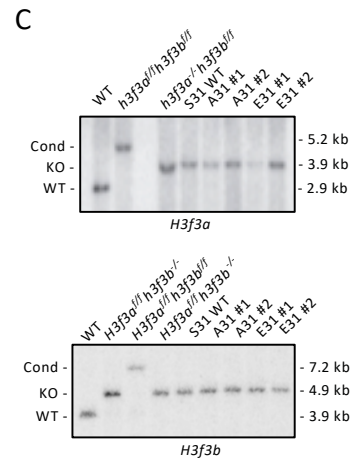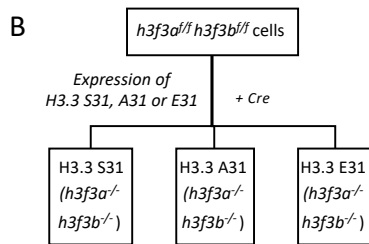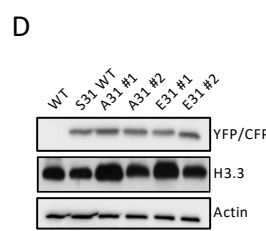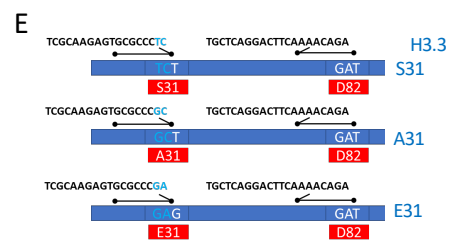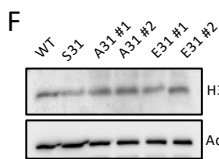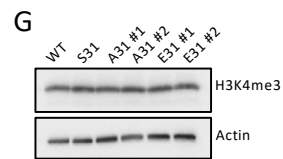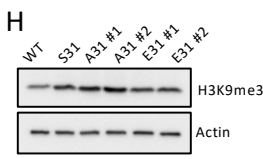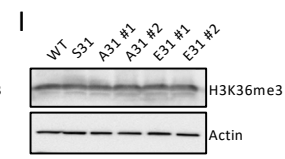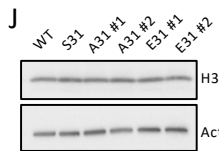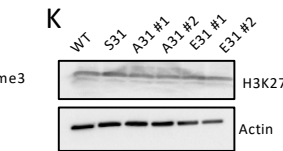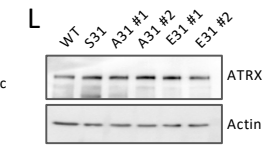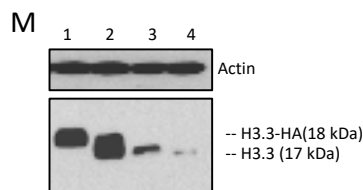

Suppl  
Fig 1

**Suppl Figure 2. KDM4B knockdown in H3.3 A31 mouse ES cells restores ATRX binding, HP1 $\alpha$  binding at telomeres. (A)** Quantitative RT-PCR analyses of *Kdm4b* expression levels in H3.3 S31, A31 and E31 mouse ES cells, 48 hours post-transfection of either control siRNA (siControl) or *Kdm4b* specific siRNA (siKdm4b). Real time RT-PCR analysis showing reduction of *Kdm4b* RNA transcripts in *Kdm4b* knockdown samples. Primers used were *Kdm4b* exons 5, 6/7 and 7/8 specific primers. **(B)** Immunostaining of HP1 $\alpha$  (red) and TERF1 (green; marker for telomere) in H3.3 S31, A31 and E31 cells 48 hours post-transfection of either control siRNA (siControl) or *Kdm4b* specific siRNA (siKdm4b). Prominent HP1 $\alpha$  staining was found at telomeres in both H3.3 S31 and E31 cell lines subjected to either siControl or siKdm4b knockdown. An increased binding of HP1 $\alpha$  to telomeres (indicated by TERF1; arrows) was found in H3.3 A31 cells, following the knockdown of *Kdm4b* expression (indicated by arrows).

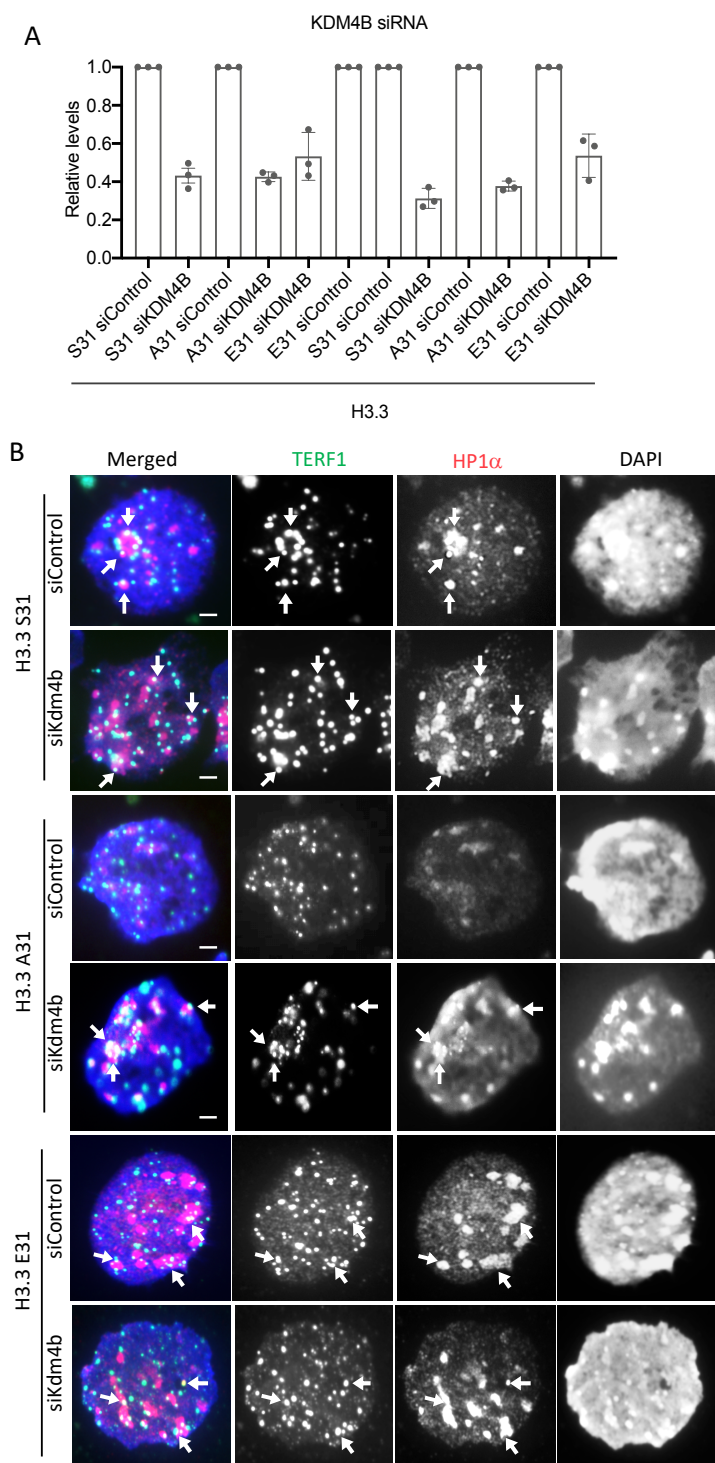

Suppl  
Fig 2

**Suppl Figure 3.** Telomere length (A) and TERRA transcript level (B) analyses of WT (wildtype) H3.3 S31, and mutant A31 and E31 ES cells (n=3 independent experiments, mean  $\pm$  SEM, n=3).

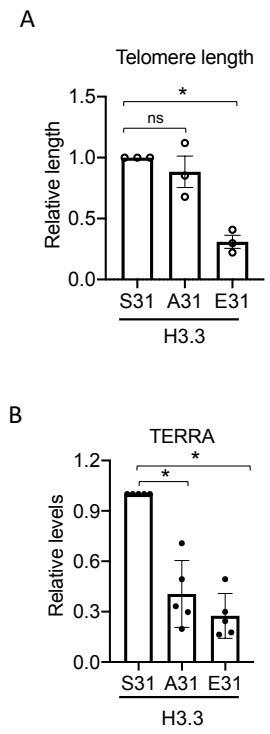

Suppl  
Fig 3

**Supplementary table 1**

Primer sequences for PCR amplification and RT-qPCR

| Primer sequences for PCR amplification and RT-qPCR analysis |                                               |                                               |
|-------------------------------------------------------------|-----------------------------------------------|-----------------------------------------------|
| <i>H3f3a</i>                                                | 5' GTCGAGCAGTGGGATAGTGTC 3'                   | 5' GACTTTTTAGGCTTTTAGATCAGATTACAG 3'          |
| <i>H3f3b</i>                                                | 5'- GGAGTGCTAGTGTGCATAAAT 3'                  | 5' CCAATAACCAACATGCTCCAA 3'                   |
| H33 S31                                                     | 5' TCGCAAGAGTGCGCCCTC 3'                      | 5' TCTGTTTTGAAGTCCTGAGCA 3'                   |
| H33 A31                                                     | 5' TCGCAAGAGTGCGCCCGC 3'                      | 5' TCTGTTTTGAAGTCCTGAGCA 3'                   |
| H33 E31                                                     | 5' TCGCAAGAGTGCGCCCGA 3'                      | 5' TCTGTTTTGAAGTCCTGAGCA 3'                   |
| Kdm4B ex5                                                   | 5' GGCGTGAATACACCCTACTT 3'                    | 5' GCAGGTAGTTGATGCTGTAGA 3'                   |
| Kdm4B ex6/7                                                 | 5'CCTGGCCATAGGCTTCTTC 3'                      | 5'CGTACTTCTTCAGGATGATGGG 3'                   |
| Kdm4B ex7/8                                                 | 5' GCCTTCCTAAGGCACAAGAT 3'                    | 5'CCCAGCTTCCTGTGTAATCC 3'                     |
| FOXP3                                                       | 5' TGAGGGAAAGAGCAAAGGAGTG 3'                  | 5' GCATCCTGCAGAGAGCTAAGAGT 3'                 |
| GAPDH                                                       | 5' GTGGAGTCTACTGGTGTCTTC 3'                   | 5' GGTCACACCCATCACAAAC 3'                     |
| Telomere (TERRA)                                            | 5' CGGTTTGTTTGGGTTTGGGTTTGGGTTTGGGTTTGGGTT 3' | 5' GGCTTGCCTTACCCTTACCCTTACCCTTACCCTTACCCT 3' |
| 36B4                                                        | 5' ACTGGTCTAGGACCCGAGAAG 3'                   | 5' TCAATGGTGCCTCTGGAGATT 3'                   |
| Yq satellite (Yr_f and Yr_r)                                | 5' A TACTACTCTAGAATACTGCATGC 3'               | 5' TGTAGTCATCAAATGGTTTCCAAG 3'                |

**Supplementary table 2**

## List of antibodies used

| Antibodies                                   | Source                  | Antibodies                                     | Source                              |
|----------------------------------------------|-------------------------|------------------------------------------------|-------------------------------------|
| H3                                           | Abcam, ab1791           | ATRX                                           | Santa Cruz Biotechnologies, sc15408 |
| H3.3                                         | Abcam, ab176840         | KDM4B                                          | Abcam, ab191434                     |
| H3K4me3                                      | Abcam, ab8580           | PML                                            | Millipore, MAB3738                  |
| H3K9me3                                      | Abcam, ab8898           | TERF1                                          | Alpha Diagnostics, TRF12-S          |
| H3K27me3                                     | Merck Millipore, 7447   | HP1 $\alpha$                                   | Merck Millipore, MAB3584            |
| H3K36me3                                     | Abcam, ab9050           | Flag                                           | Sigma, F1804                        |
| H3K27Ac                                      | Merck Millipore, 7360   | GFP                                            | Roche, 11814460001                  |
| $\gamma$ H2A.X/phospho-H2A.X (Ser139)        | Merck Millipore, JBW301 | $\beta$ Actin (AC15)                           | Santa Cruz Biotechnology, sc6987    |
| Donkey anti-Mouse IgG, HRP conjugate         | Merck Millipore, AP192P | Donkey anti-Mouse IgG (H+L), Alexa Fluor 488   | Invitrogen, A-21202                 |
| Goat anti Rabbit IgG, HRP conjugate          | Merck Millipore, AP187P | Donkey anti-Rabbit IgG (H+L), Alexa Fluor 488  | Invitrogen, A-21206                 |
| Donkey anti-Mouse IgG (H+L), Alexa Fluor 594 | Invitrogen, A-21203     | Chicken anti-Rabbit IgG (H+L), Alexa Fluor 594 | Invitrogen, A-21442                 |

**Supplementary table 3**

Amino acid sequences for the short peptides used

| Peptides          | Amino acid sequences                          |
|-------------------|-----------------------------------------------|
| H3.3 S31 K36me3   | ATKAARKSAPSTGGVK(Me3) KPHRYRPG-GK(Biotin)     |
| H3.3 S31Ph K36me3 | ATKAARKSAPS(Ph)TGGVK(Me3) KPHRYRPG-GK(Biotin) |
| H3.3 A31 K36me3   | ATKAARKSAPATGGVK(Me3) KPHRYRPG-GK(Biotin)     |
| H3.3 E31 K36me3   | ATKAARKSAPETGGVK(Me3) KPHRYRPG-GK(Biotin)     |

**Supplementary table 4**

Oligonucleotide sequences of siRNA used

| siRNA          | Sense                       | Anti-sense                  |
|----------------|-----------------------------|-----------------------------|
| Kdm4b-mus-2703 | 5' GCAGCGAUGGAAACUGAAATT 3' | 3' UUUCAGUUUCCAUCGCUGCTT 5' |
| Kdm4b-mus-2933 | 5' GCCAGAUCGUCAUCACCAATT 3' | 3' UUGGUGAUGACGAUCUGGCTT 5' |
| Kdm4b-mus-3478 | 5'CCUGUCCCACUGUAGGUAATT 3'  | 3' UUACCUACAGUGGGACAGGTT 5' |
| Kdm4b-mus-4552 | 5' CCUCCAGUUCAGUAUCAAUTT 3' | 3' AUUGAUACUGAACUGGAGGTT 5' |
